# Supplementary material
Source: PubMed Central journal article supplement (PMC2267388)
Supplement: 7401161-s1.pdf [file 7401161-s1.pdf]

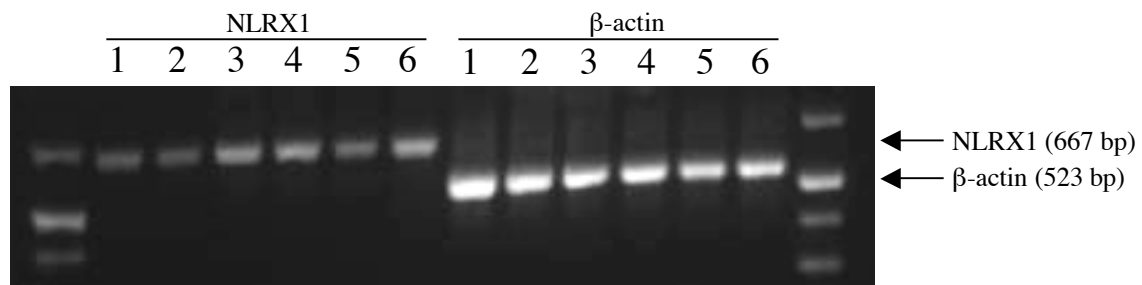

**Supplementary Figure 1:** Expression of NLRX1 in human cell lines. 1: HeLa, 2: HEK293T, 3: MCF-7, 4: Ramos, 5: Jurkat, 6: THP1. The following oligonucleotides were used to amplify NLRX1 and β-actin:

NLRX1:

5'-GCTCCATGGCTTAGAGCATC-3' (forward)

5'-AACTCCTCCTCCGTCCTGAT-3' (reverse)

β-actin

5'-GTGGGGCGCCCCAGGCACCA-3' (forward)

5'-CTCCTTAATGTCACGCACGATTTC-3' (reverse)

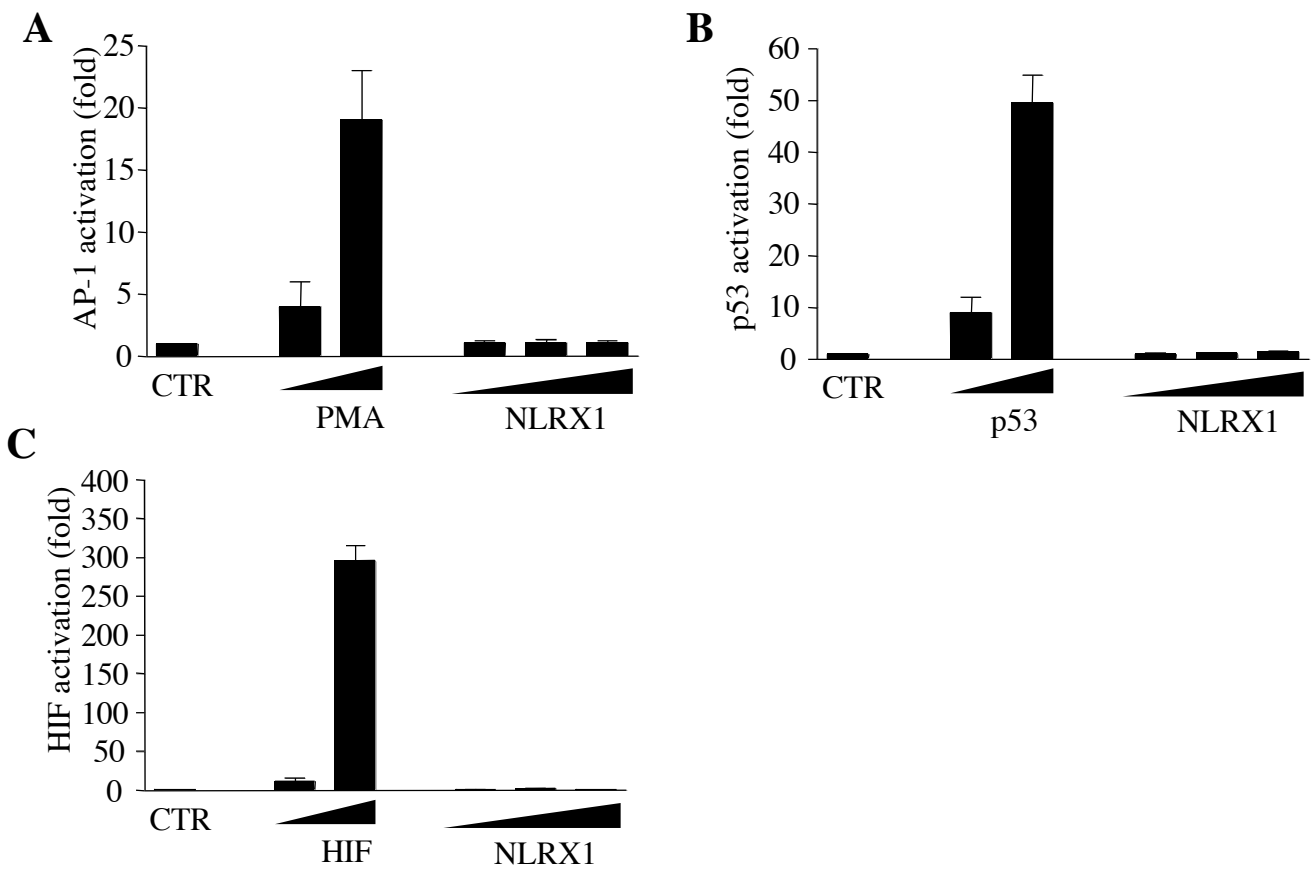

**Supplementary Figure 2: NLRX1 overexpression does not trigger AP-1-, p53- or HIF-dependent pathways.** HEK293T epithelial cells were transfected with increasing amounts (10, 100 and 250 ng) of NLRX1 expression vector together with AP-1- (A), p53- (B) and hypoxia inducible factor- (HIF) (C) luciferase-reporter constructs. Different positive controls were used, depending of the luciferase-reporter construct used: PMA (A; 10 and 100ng/ml) or p53 (B) and HIF-1 $\alpha$  (C) expression vectors (transfection of 20 or 200 ng). Data show the mean  $\pm$  s.e.m of duplicates and is representative of three independent experiments. CTR, control.

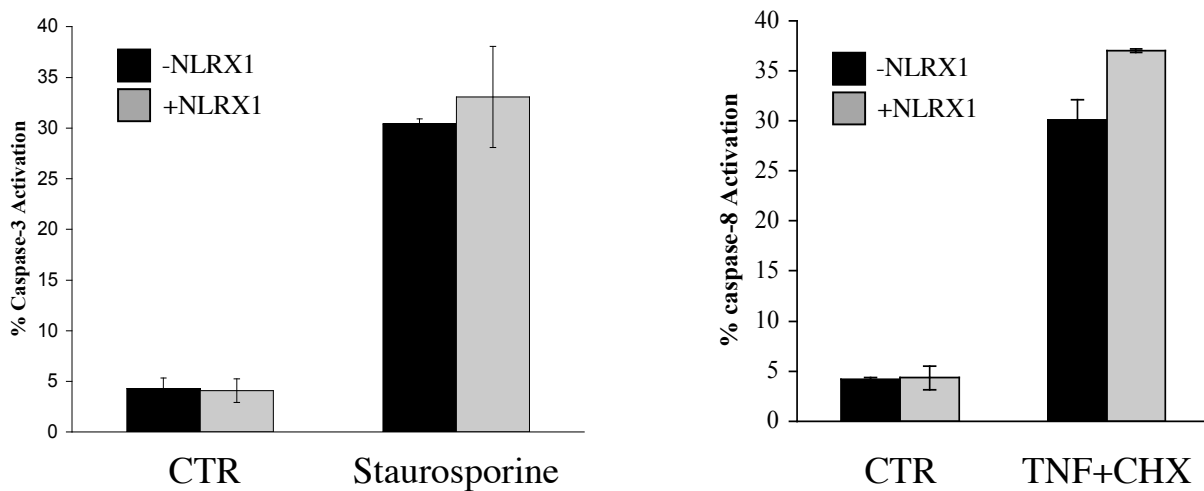

**Supplementary Figure 3:** NLRX1 overexpression does not significantly alter apoptosis. HeLa cells were transfected overnight with NLRX1 and stimulated for 2 hours with either 2  $\mu$ M staurosporine (left panel) or TNF (10 ng/ml) plus cycloheximide (CHX; 0,5  $\mu$ g/ml) (right panel). Activation of caspase-3 and caspase-8 were quantified by immunofluorescence using antibodies that detect the cleaved caspase-3 and cleaved caspase-8 in cells over-expressing or not NLRX1. The expression of NLRX1 was determined using an antibody against the FLAG epitope. For each experiment, a minimum of 200 cells were quantified, and the results presented are representative of three independent experiments.

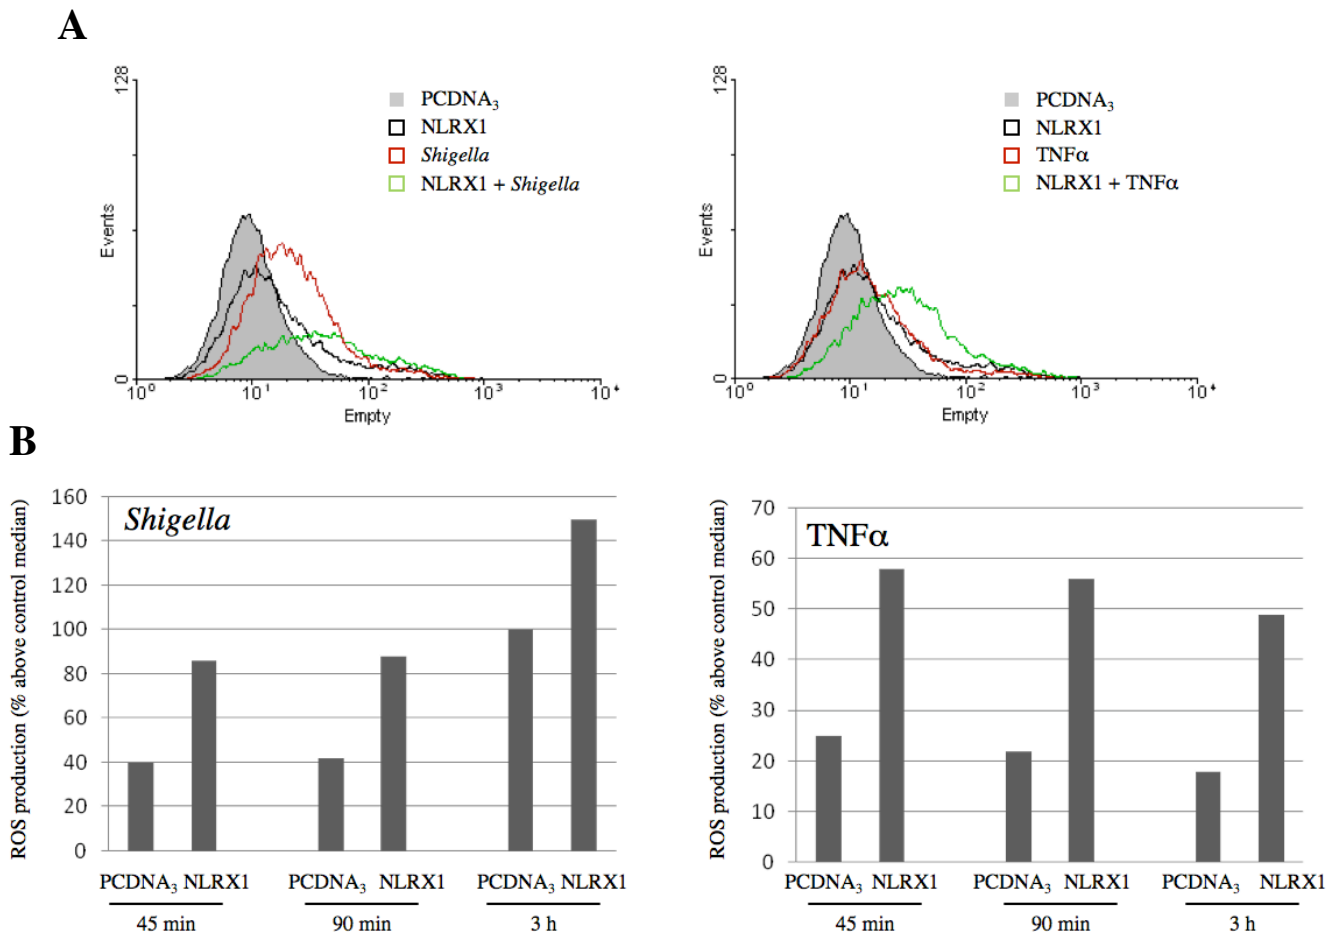

**Supplementary Figure 4:** Kinetics of reactive oxygen species production following *Shigella* infection or TNF $\alpha$  stimulation for up to 3h in cells over-expressing NLRX1. HeLa cells were transfected overnight with pcDNA3 or NLRX1 vectors and infected for 3 hours with *Shigella* (left panel) or stimulated for 3 hours with 10 ng/ml TNF $\alpha$  (right panel). ROS production was measured using a redox-sensitive dye (CM-H<sub>2</sub>DCFDA) on live cells, followed by flow cytometry analysis. (B) Time-course analysis of ROS production induced by *Shigella* (left panel) and TNF $\alpha$  (right panel) in cells transfected with pcDNA3 or NLRX1, as in (A). The results presented are representative of three independent experiments.

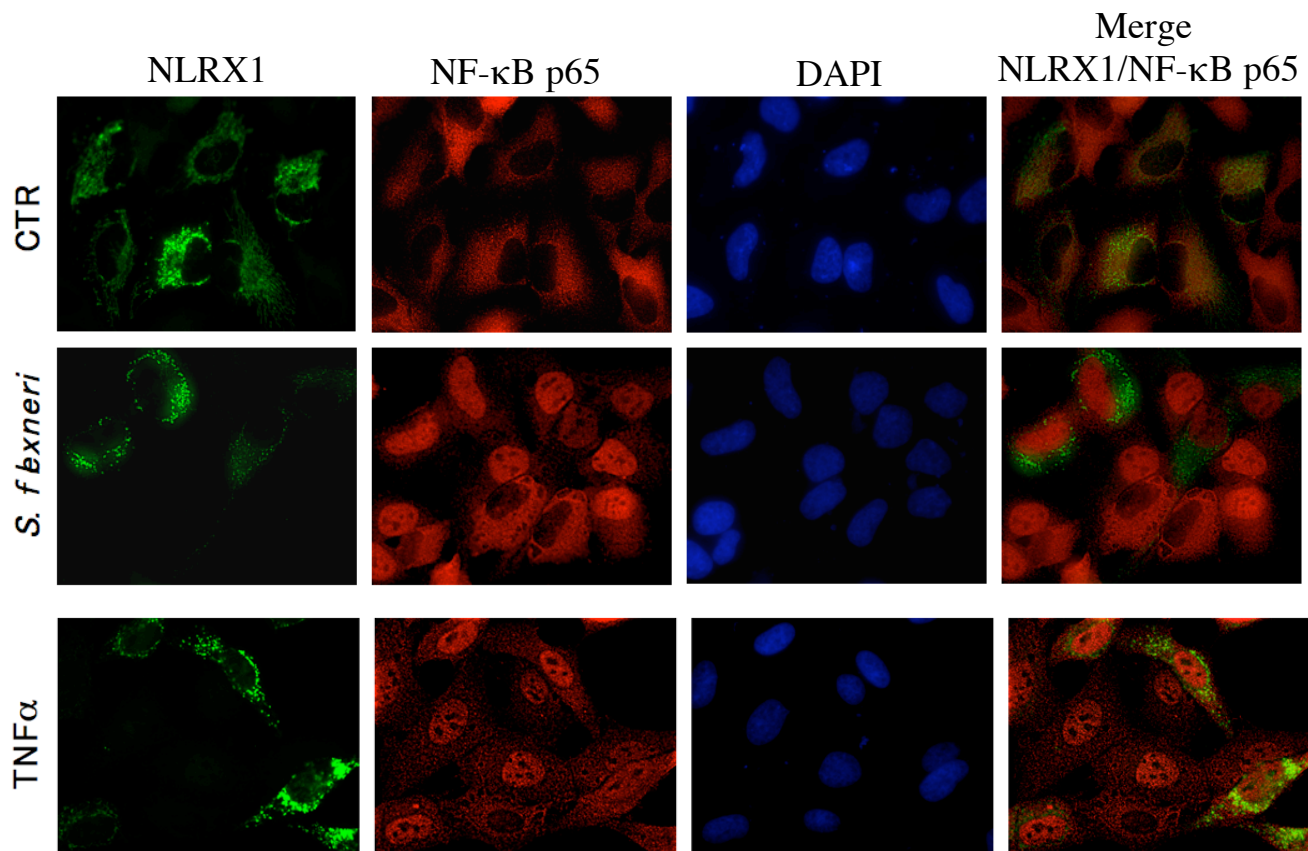

**Supplementary Figure 5:** HeLa cells grown on glass coverslips were transfected overnight with NLRX1 expression vector and infected with *Shigella* or stimulated with 10 ng/ml TNF $\alpha$  for 1 hour. NLRX1 over-expressing cells were stained using a monoclonal anti-Flag antibody, and a polyclonal anti-NF- $\kappa$ B p65 antibody was used to assess the cellular localization of this NF- $\kappa$ B subunit. Cells in which the NF- $\kappa$ B is activated display nuclear localization of NF- $\kappa$ B p65. DAPI was used to stain nuclei. Such experimental set-up was used to perform quantification analyses presented in Figure 4C-D. Note that for quantification purposes, fields were picked randomly and > 500 cells (from 3 independent experiments) per condition/time point were analyzed for NLRX1 over-expression and NF- $\kappa$ B p65 nuclear translocation.

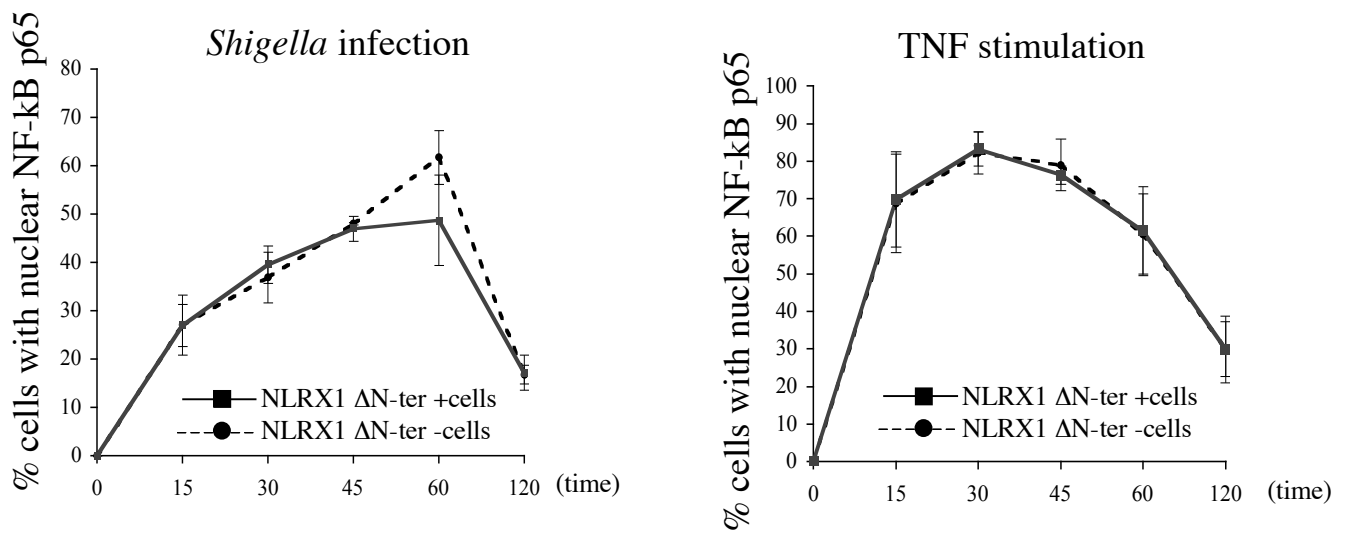

**Supplementary Figure 6:** NLRX1 localization to the mitochondria is critical for the modulation of *Shigella*- and TNF-dependent NF- $\kappa$ B activation. HeLa cells grown on glass coverslips were transfected overnight with NLRX1  $\Delta$ N-ter expression vector and infected with *Shigella* (left) or stimulated with 10 ng/ml TNF $\alpha$  (right) for various times, as indicated. The nuclear translocation of NF- $\kappa$ B p65 subunit (as an indicator of the activation of the NF- $\kappa$ B pathway) was evaluated by immunofluorescence in cells over-expressing NLRX1  $\Delta$ N-ter (NLRX1  $\Delta$ N-ter +cells) or not (NLRX1  $\Delta$ N-ter -cells). Data show the mean  $\pm$  s.e.m of three independent experiments, and for each condition and time point, a minimum of 500 cells were counted.
